# Supplementary material
Source: PubMed Central journal article supplement (PMC6346626)
Supplement: oc8b00788_si_001.pdf [file oc8b00788_si_001.pdf]

# Quantum Chemistry on Quantum Computers: A Method for Preparation of Multiconfigurational Wave Functions on Quantum Computers without Performing Post-Hartree–Fock Calculations

Kenji Sugisaki,<sup>†,\*</sup> Shigeaki Nakazawa,<sup>†</sup> Kazuo Toyota,<sup>†</sup> Kazunobu Sato,<sup>†,\*</sup> Daisuke Shiomi,<sup>†</sup> and Takeji Takui<sup>†,‡,\*</sup>

<sup>†</sup> *Department of Chemistry and Molecular Materials Science, Graduate School of Science, Osaka City University, 3-3-138 Sugimoto, Sumiyoshi-ku, Osaka 558-8585, Japan.*

<sup>‡</sup> *Research Support Department/University Research Administrator Center, University Administration Division, Osaka City University, 3-3-138 Sugimoto, Sumiyoshi-ku, Osaka 558-8585, Japan.*

\* E-mail: sugisaki@sci.osaka-cu.ac.jp; sato@sci.osaka-cu.ac.jp; takui@sci.osaka-cu.ac.jp

## Supporting Information

### Contents

|                                                                                                                                                                                                        | Pages |
|--------------------------------------------------------------------------------------------------------------------------------------------------------------------------------------------------------|-------|
| <b>Figure S1:</b> Square overlap between the full-CI/cc-pVDZ wave function of the ground state and two-configurational wave functions using diradical characters computed from DFT in H <sub>2</sub> . | S2    |
| <b>Figure S2:</b> Diradical characters of ethane, ethylene and acetylene calculated from UHF.                                                                                                          | S3    |
| <b>Table S1:</b> Square overlap of the initial guess and CAS-CI wave functions in phenylene-1,4-dinitrene.                                                                                             | S4    |

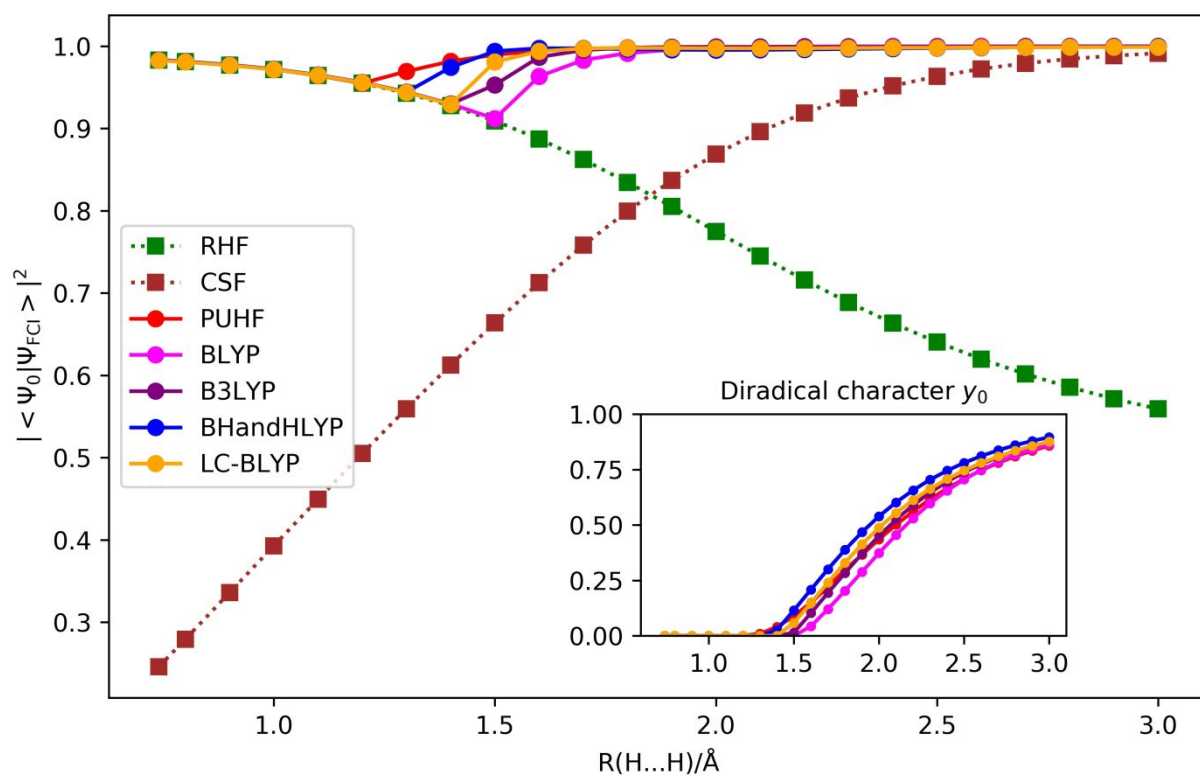

**Figure S1:** Square overlap between the full-CI/cc-pVDZ wave function of the ground state and two-configurational wave functions using diradical characters computed from DFT in  $\text{H}_2$ . Inset: Diradical character  $\gamma_0$  calculated from the occupation number of natural orbitals.

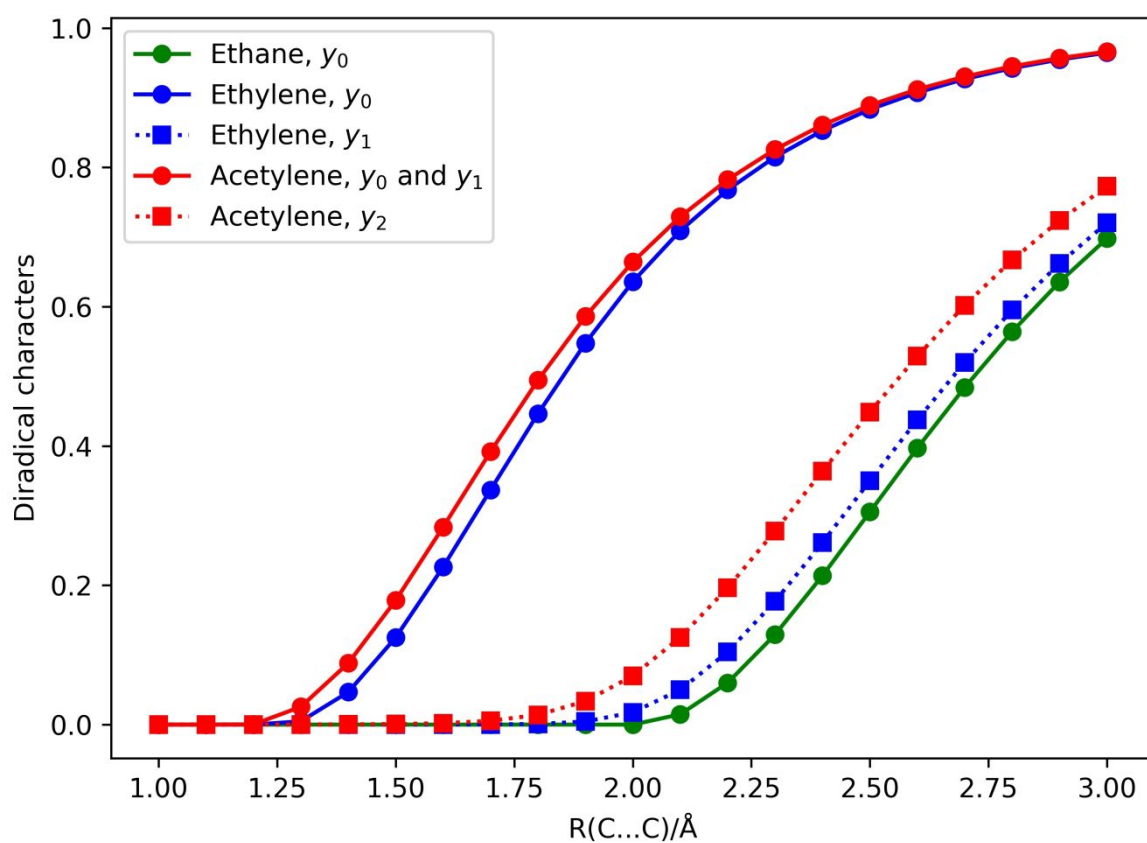

**Figure S2:** Diradical characters of ethane, ethylene and acetylene calculated from the spin-projected UHF.

**Table S1:** Square overlap of the initial guess and CAS-CI wave functions in phenylene-1,4-dinitrene.

| Initial guess wave function         | Square overlap with the CAS-CI wave function |                      |
|-------------------------------------|----------------------------------------------|----------------------|
|                                     | Without spin projection                      | With spin projection |
| RHF                                 |                                              | 0.3894               |
| Use $y_0$                           | 0.8754                                       | 0.8754               |
| Use $y_0$ and $y_1$                 | 0.8782                                       | 0.9119               |
| Use $y_0, y_1,$ and $y_2$           | 0.8827                                       | 0.9203               |
| Use $y_0, y_1, y_2,$ and $y_3$      | 0.8974                                       | 0.9286               |
| Use $y_0, y_1, y_2, y_3,$ and $y_4$ | 0.8986                                       | 0.9298               |
